# Supplementary material for: Assessing the public attitude toward low-income housing; (case study: Small- and medium-density cities of Iran)
Source: Frontiers journal article supplement (doi:10.3389/fbuil.2022.870240), 2022-08-31
Supplement: Data_Sheet_1.docx [file Data_Sheet_1.docx]

**Appendix A**

Table A1. One-Sample Test for Cognitive components

| **One-Sample Statistics** | | | | |
| --- | --- | --- | --- | --- |
|  | N | Mean | Std. Deviation | Std. Error Mean |
| F1M | 308 | 2.8580 | .65472 | .03731 |
| F2M | 308 | 1.7565 | .56849 | .03239 |
| F3M | 308 | 1.6201 | .59464 | .03388 |
| F4M | 308 | 2.5384 | .49579 | .02825 |
| F5M | 308 | 2.4329 | .73595 | .04193 |
| F6M | 308 | 1.7857 | .67388 | .03840 |
| F7M | 308 | 2.6169 | .62030 | .03534 |
| F8M | 308 | 1.8250 | .59163 | .03371 |
| F9M | 308 | 2.6661 | .60483 | .03446 |
| F10M | 308 | 1.9838 | .66347 | .03780 |
| F11M | 308 | 3.0119 | .66083 | .03765 |

| **One-Sample Test** | | | | | | |
| --- | --- | --- | --- | --- | --- | --- |
|  | Test Value = 3 | | | | | |
| t | df | Sig. (2-tailed) | Mean Difference | 95% Confidence Interval of the Difference | |
| Lower | Upper |
| F1M | -3.808 | 307 | .000 | -.14205 | -.2155 | -.0686 |
| F2M | -38.388 | 307 | .000 | -1.24351 | -1.3072 | -1.1798 |
| F3M | -40.725 | 307 | .000 | -1.37987 | -1.4465 | -1.3132 |
| F4M | -16.339 | 307 | .000 | -.46158 | -.5172 | -.4060 |
| F5M | -13.523 | 307 | .000 | -.56710 | -.6496 | -.4846 |
| F6M | -31.624 | 307 | .000 | -1.21429 | -1.2898 | -1.1387 |
| F7M | -10.839 | 307 | .000 | -.38312 | -.4527 | -.3136 |
| F8M | -34.855 | 307 | .000 | -1.17500 | -1.2413 | -1.1087 |
| F9M | -9.688 | 307 | .000 | -.33387 | -.4017 | -.2661 |
| F10M | -26.881 | 307 | .000 | -1.01623 | -1.0906 | -.9418 |
| F11M | .316 | 307 | .752 | .01190 | -.0622 | .0860 |

Table A2. Summary of data regression model for both dependent variables

| **Model Summary 1** | | | | |  |  | **Model Summary 2** | | | |  |
| --- | --- | --- | --- | --- | --- | --- | --- | --- | --- | --- | --- |
| Model | R | R Square | Adjusted R Square | Std. Error of the Estimate |  | Model | R | R Square | Adjusted R Square | Std. Error of the Estimate | |
| 1 | .515a | .265 | .263 | 1.70899 |  | 1 | .657a | .432 | .430 | | 1.49630 |
| 2 | .580b | .337 | .332 | 1.62650 |  | 2 | .694b | .482 | .478 | | 1.43216 |
| 3 | .597c | .357 | .350 | 1.60412 |  | 3 | .708c | .501 | .496 | | 1.40675 |
| a. Predictors: (Constant), f1A | | | | |  | 4 | .718d | .516 | .509 | | 1.38875 |
| b. Predictors: (Constant), f1A, f4C | | | | |  | 5 | .724e | .524 | .517 | | 1.37840 |
| c. Predictors: (Constant), f1A, f4C, f1C | | | | |  |  |  |  |  | |  |
|  | | | | |  | Predictors: (Constant), f2A | | | | | |
|  | | | | |  | Predictors: (Constant), f2A, f4C | | | | | |
|  | | | | |  | Predictors: (Constant), f2A, f4C, f7C | | | | | |
| *** C: Cognitive / A: Affective / B: Behavioral** | | | | |  | Predictors: (Constant), f2A, f4C, f7C, f5C | | | | | |
|  | | | | |  | Predictors: (Constant), f2A, f4C, f7C, f5C, f1C | | | | | |

Table A3. Beta coefficient and order of priority of cognitive and emotional factors affecting social distance and spatial behavior

| **Coefficientsa** (Model 1) | | | | | | |  |  |  | **Coefficientsa** (Model 2) | | |  |  |
| --- | --- | --- | --- | --- | --- | --- | --- | --- | --- | --- | --- | --- | --- | --- |
| Model | | Unstandardized Coefficients | | Standardized Coefficients | t | Sig. |  |  |  | Unstandardized Coefficients | | Standardized Coefficients |  |  |
| B | Std. Error | Beta |  |  | Model | B | Std. Error | Beta | t | Sig. |
| 1 | (Constant) | 2.789 | .316 |  | 8.821 | .000 |  | 1 | (Constant) | 3.291 | .386 |  | 8.525 | .000 |
| F1A | .173 | .016 | .515 | 10.509 | .000 |  | F2A | .359 | .024 | .657 | 15.262 | .000 |
| 2 | (Constant) | .553 | .493 |  | 1.122 | .263 |  | 2 | (Constant) | 1.787 | .463 |  | 3.860 | .000 |
| f1A | .131 | .017 | .389 | 7.530 | .000 |  | F2A | .292 | .026 | .535 | 11.353 | .000 |
| F4C | .198 | .035 | .296 | 5.729 | .000 |  | F4C | .169 | .031 | .254 | 5.387 | .000 |
| 3 | (Constant) | .067 | .511 |  | .130 | .896 |  | 3 | (Constant) | 1.300 | .476 |  | 2.733 | .007 |
| F1A | .111 | .018 | .329 | 6.037 | .000 |  | F2A | .252 | .028 | .462 | 9.089 | .000 |
| F4C | .152 | .037 | .227 | 4.079 | .000 |  | F4C | .151 | .031 | .227 | 4.845 | .000 |
| F1C | .136 | .044 | .179 | 3.093 | .002 |  | F7C | .178 | .051 | .167 | 3.481 | .001 |
|  | a. Dependent Variable: f1B | | | | |  |  | 4 | (Constant) | 1.191 | .471 |  | 2.528 | .012 |
|  |  |  |  |  |  |  |  | F2A | .230 | .028 | .421 | 8.089 | .000 |
|  |  |  |  |  |  |  |  | F4C | .129 | .032 | .194 | 4.069 | .000 |
|  |  |  |  |  |  |  |  | F7C | .164 | .051 | .154 | 3.248 | .001 |
|  |  |  |  |  |  |  |  | F5C | .125 | .042 | .139 | 2.989 | .003 |
|  |  |  |  |  |  |  |  | 5 | (Constant) | 1.098 | .469 |  | 2.339 | .020 |
|  |  |  |  |  |  |  |  | F2A | .190 | .033 | .349 | 5.816 | .000 |
|  |  |  |  |  |  |  |  | F4C | .111 | .032 | .167 | 3.432 | .001 |
|  |  |  |  |  |  |  |  | F7C | .154 | .050 | .144 | 3.047 | .003 |
|  |  |  |  |  |  |  |  | F5C | .103 | .043 | .115 | 2.422 | .016 |
|  |  |  |  |  |  |  |  | F1C | .108 | .046 | .143 | 2.359 | .019 |
|  | | | | | | |  |  | a. Dependent Variable: f2B | | | | | |
